# Supplementary material for: High-pressure real-time 129Xe NMR: monitoring of surfactant conformation during the self-assembly of reverse micelles in supercritical carbon dioxide
Source: Royal Society of Chemistry journal article supplement (doi:10.1039/b927029a), 2010-01-01
Supplement: b927029a.pdf [file b927029a.pdf]

Electronic Supplementary Information (ESI) for:

## High-Pressure Real-Time $^{129}\text{Xe}$ NMR: Monitoring of Surfactant Conformation during the Self-assembly of Reverse Micelles in Supercritical Carbon Dioxide<sup>†‡</sup>

Idriss Blakey,<sup>a,b</sup> Kristofer J. Thurecht<sup>a,b</sup> and Andrew K. Whittaker<sup>\*a,b</sup>

<sup>a</sup> The University of Queensland, Centre for Advanced Imaging, St Lucia, Queensland, Australia 4072

<sup>b</sup> The University of Queensland, Australian Institute for Bioengineering and Nanotechnology, St Lucia, Queensland, Australia 4072

\* Corresponding Author E-mail: a.whittaker@uq.edu.au

### Experimental

The CO<sub>2</sub>-philic surfactant, PFPECOO<sup>-</sup>NH<sub>4</sub><sup>+</sup> was prepared using a method reported in the literature.<sup>1</sup> In a typical NMR experiment, 22 mg of PFPECOO<sup>-</sup>NH<sub>4</sub><sup>+</sup> and 3  $\mu\text{L}$  of water (giving a water to surfactant molar ratio of 20) were placed in a home-build high pressure poly(ether ether ketone) (PEEK) cell, the design of which has been described previously.<sup>2</sup> The PEEK cell was able to fit within a Bruker 10 mm bird cage resonator within the NMR magnet of a Bruker AMX300 spectrometer. A pressure of 2 MPa of xenon was introduced into the cell and the system was allowed to come to equilibrium at 313 K over five hours. Following this, liquid CO<sub>2</sub> was introduced into the cell using a high-pressure syringe pump to a final applied pressure of 30 MPa. The  $^{129}\text{Xe}$  NMR spectra were collected using the standard single-pulse excitation method, with a 90° pulse time of 15  $\mu\text{s}$ , receiver dead time of 15  $\mu\text{s}$  and a repetition time of 10 seconds. The spectral width was 100 kHz and 32 repetitions were co-added.

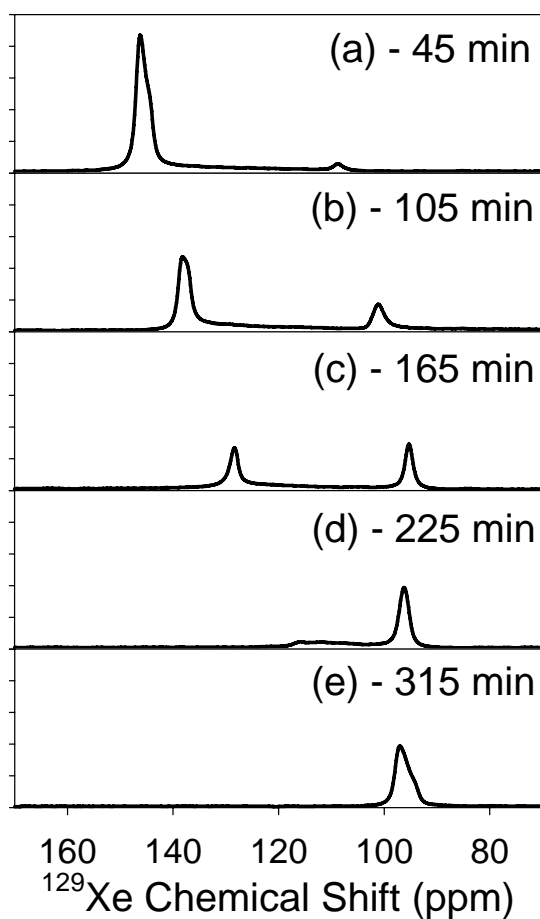

#### Supplementary References

- (1) Thurecht, K. J.; Hill, D. J. T.; Whittaker, A. K. *J. Supercrit. Fluids* **2006**, 38, 111.
- (2) Thurecht, K. J.; Hill, D. J. T.; Whittaker, A. K. *Macromol. Chem. Phys.* **2006**, 207, 1539.
